# Supplementary material for: Relationship between respiratory muscles ultrasound parameters and running tests performance in adolescent football players. A pilot study
Source: PeerJ. 2023 Apr 17;11:e15214. doi: 10.7717/peerj.15214 (PMC10117394; doi:10.7717/peerj.15214)
Supplement: Supplemental Information 1 [file peerj-11-15214-s001.xlsx]

## Sheet: Arkusz1
ID	age	sex (K/M)	Body mass	body height	BMI	Training [years]	Speed test	5m	10m	30m	Beep Test_LEVEL	Test_ODC_TOTAL	Beep Test_ODC	Beep Test_TEMPO	Beep Test_Vo2max	USG	SWE	longitudinal	D_INS	D_EXP	D_ratio_L	IC_INS	IC_EXP	IC_ratio_L	Thickness	longitudinal	D_INS	D_EXP	D_ratio_L	IC_INS	IC_EXP	IC_ratio_L		Excursion	Velocity cm/s
001DS	17	M	70	182	21.1327	7		1.06	1.78	4.03	14	145	1	15	60.9345				31.75	28.7167	1.10563	31.5	25.6667	1.22727			1.48333	1.33333	1.1125	4.3	4.41667	0.973585		4.62	1.60305
002DS	18	M	79	182	23.8498	8		1.11	1.81	4.14	12	119	1	14	54.617				26.7	24.9833	1.06871	19.55	20	0.9775			1.96667	1.36667	1.43902	2.88333	3.16667	0.910526		2.39	1.71695
003DS	17	M	64.5	180	19.9074	7		1.08	1.9	4.57	12	119	1	14	55.632				41.4833	40.9333	1.01344	37.15	41.3	0.899516			1.35	1.46667	0.920455	3.53333	3.8	0.929825		6.16	3.46652
004DS	17	M	66	174.5	21.6747	7		1.02	1.75	4.14	13	134	3	14.5	57.7758				34.2667	34.2167	1.00146	27.55	28.2833	0.974072			1.25	1.25	1	4.56667	5.01667	0.910299		5.07	1.79406
005DS	17	M	72	180	22.2222	7		0.97	1.78	4.1	14	149	5	15	60.9345				28.6667	24.0167	1.19362	26.6	23.15	1.14903			1.85	1.95	0.948718	3.75	2.83333	1.32353		4.55	1.26494
006DS	17	M	86	180	26.5432	9		0.96	1.68	4.01	12	119	1	14	54.617				35.9667	25.6333	1.40312	23.95	21.3	1.12441			3.58333	2.71667	1.31902	5.41667	4.86667	1.11301		4.3	1.18653
007DS	17	M	69.5	178	21.9354	8		1.03	1.73	4.13	14	146	2	15	60.9345				34.9167	25.1	1.3911	31.2333	24.8	1.25941			3.55	2.48333	1.42953	4.3	3.8	1.13158		5.8	3.40776
009DS	17	M	69	176	22.2753	8		1.03	1.77	4.4	13	134	1	14.5	57.7758				31.25	25.5	1.22549						2.56667	1.96667	1.30508					4.82	2.1939
010DS	17	M	61	173	20.3816	7		0.97	1.67	4.09	12	119	1	14	56.876				34.6167	27.2167	1.27189	34.4	27.15	1.26703			1.55	1.5	1.03333	4.05	3.81667	1.06114		2.72	1.28241
011DS	17	M	79.5	183	23.7391	7		1.04	1.79	4.28	12	120	2	14	54.617				28.6667	28.5167	1.00526	25.9333	24.8	1.0457			3.15	1.83333	1.71818	4.61667	5.36667	0.860248		2.46	1.20647
013DS	17	M	67	178	21.1463	7		1.13	1.89	4.37	12	119	1	14	52.547				21.8	24.2333	0.899587	18	20.1333	0.89404			1.38333	1.13333	1.22059	3.7	3.96667	0.932773		5.48	2.61077
014DS	17	M	67	170	23.1834	8		1.07	4.18	4.57	10	98	4	13	48.2995				25.6	30.3833	0.842567	23.8667	27.9	0.855436			2.43333	1.83333	1.32727	5.35	5.46667	0.978659		6.12	2.44214
015DS	17	M	83.9	182	25.3291	8		1.01	1.76	4.4	11	114	8	13.5	51.4583				40.35	38.0833	1.05952	30.2167	35.05	0.862102			2.71667	2.66667	1.01875	3.61667	2.96667	1.2191		4.53	0.906181
016DS	17	M	70	181	21.3669	8		0.98	1.75	4.2	12	122	4	14	54.617				22.4	25.3333	0.884211	20.2167	21.95	0.921033			1.33333	1.31667	1.01266	2.46667	2.68333	0.919255		3.47	1.77403
017DS	18	M	74.5	182	22.4912	9		1.03	1.78	4.11	12	122	4	13	52.317				30.8667	25.15	1.2273	20.9167	18.8333	1.11062			1.21667	1.1	1.10606	2.41667	2.91667	0.828571		6.54	2.51538
018DS	17	M	74	192	20.0738	9		1.04	1.71	3.87	12	120	2	14	54.617				40.45	31.4833	1.28481	38.5667	32.4333	1.18911			2.13333	1.33333	1.6	3.3	3.95	0.835443
019DS	17	M	83	194	22.0534	7		0.98	1.72	4.08	13	133	2	14.5	57.7758				24.9333	22.8833	1.08958	20.45	24.1667	0.846207			2.48333	2.06667	1.20161	4.31667	4.16667	1.036		3.75	2.443
020DS	17	M	76.5	176	24.6965	9		1.04	1.82	4.43	14	149	5	15	60.9345				22.4667	29.35	0.765474	22.2167	27.4333	0.809842			3.95	3.16667	1.24737	5.18333	4.65	1.1147		7.65	4.25473
021DS	17	M	66	182	19.9251	8		0.96	1.65	3.96	12	123	5	14	54.617				39.5	42.6167	0.926867	33.0333	35.6167	0.927468			1.31667	1.2	1.09722	3.33333	4.96667	0.671141
022DS	17	M	60	170	20.7612	8		0.95	1.6	4.02	14	146	2	15	60.9345				33.4167	32.2	1.03778	29.0833	27.7667	1.04742			1.78333	1.58333	1.12632	4.63333	4.88333	0.948805		3.72	1.64166
023DS	17	M	58	178	18.3058	8		1	1.75	4.35	12	122	4	15	59.653				33.3	34.2833	0.971317	34.4	35.6833	0.964035			1.68333	1.3	1.29487	4.3	5.01667	0.857143		3.84	3.05976
024DS	17	M	75	182	22.6422	7		1.12	1.85	4	12	125	7	14	54.617				23.15	26.2833	0.880786	20.9833	23.25	0.902509			1.28333	1.06667	1.20313	3.63333	3.2	1.13542		6.53	1.86945
